# Supplementary material
Source: Springer Nature journal article supplement (https://www.springermedizin.de/resource/supplementary/13063_2011_706_MOESM2_ESM.pdf/9618560)

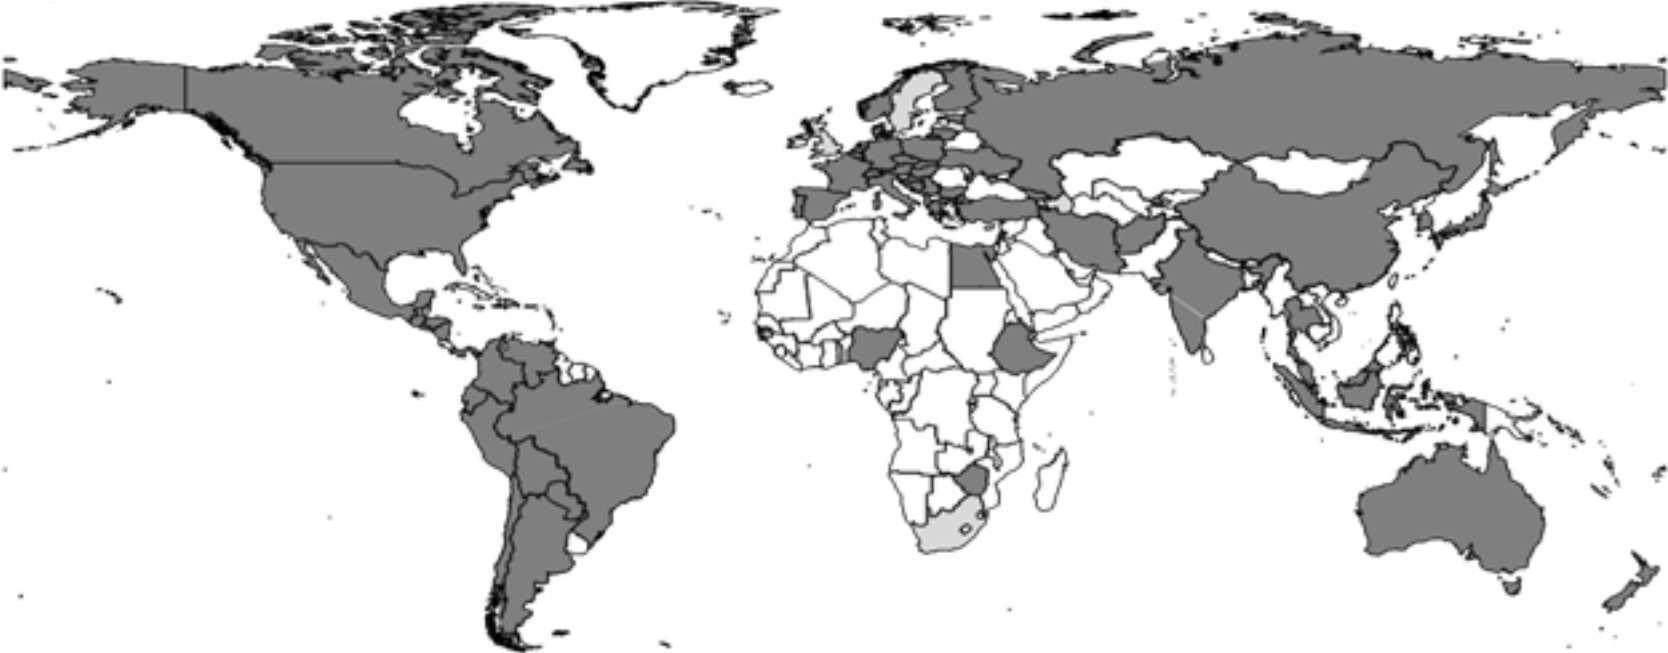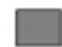

Physical restraints are used

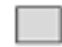

Physical restraints rarely used

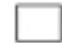

No information

Supplement: MOESM2 [file 9618560]
